# Supplementary material for: Revisiting aneuploidy profile of surgically retrieved spermatozoa by whole exome sequencing molecular karyotype
Source: PubMed Central journal article supplement (PMC6319716; doi:10.1371/journal.pone.0210079), 2019-01-04
Supplement: pone.0210079.s001.pdf [file pone.0210079.s001.pdf]

**S1 Table. List of FISH probe Sets, probe locations and fluorophore signals for each**

| <b>Oligo X Y 15 17 (OF4-0052-0100)</b>                     |                                   |                    |
|------------------------------------------------------------|-----------------------------------|--------------------|
| <b>Chromosome</b>                                          | <b>Location</b>                   | <b>Fluorophore</b> |
| X                                                          | Centromere, locus DXZ1            | Red                |
| Y                                                          | Yq12 Satellite III DNA            | Green              |
| 15                                                         | Centromere, locus D15Z1           | Gold               |
| 17                                                         | Centromere, locus D17Z1           | Aqua               |
| <b>Oligo X Y 16 18 (OF4-0135-0100)</b>                     |                                   |                    |
| <b>Chromosome</b>                                          | <b>Location</b>                   | <b>Fluorophore</b> |
| X                                                          | Centromere, locus DXZ1            | Red                |
| Y                                                          | Yq12, locus DYZ1                  | Gold               |
| 16                                                         | Centromere, locus D16Z1           | Green              |
| 18                                                         | Centromere, locus D18Z1           | Aqua               |
| <b>Vysis MultiVysion PGT Multi-color Probe (05J32-080)</b> |                                   |                    |
| <b>Probe</b>                                               | <b>Location</b>                   | <b>Fluorophore</b> |
| Vysis LSI 13                                               | 13q14                             | Red                |
| Vysis LSI 21                                               | 21q22.13-22.2                     | Green              |
| Vysis CEP 18                                               | 18p11.1-q11.1 Alpha Satellite DNA | Aqua               |
| Vysis CEP X                                                | Xp11.1-q11.1 Alpha Satellite DNA  | Blue               |
| Vysis CEP Y                                                | Yp11.1-q11.1 Alpha Satellite DNA  | Gold               |
| <b>Vysis MultiVysion PB Multi-color Probe (05J31-085)</b>  |                                   |                    |
| <b>Probe</b>                                               | <b>Location</b>                   | <b>Fluorophore</b> |
| Vysis LSI 13                                               | 13q14                             | Red                |
| Vysis LSI 21                                               | 21q22.13-22.2                     | Green              |
| Vysis LSI 22                                               | 22q11.2                           | Gold               |
| Vysis CEP 16                                               | 16q11.2 Satellite II DNA          | Aqua               |
| Vysis CEP 18                                               | 18p11.1-q11.1 Alpha Satellite DNA | Blue               |
